# Supplementary material for: Quantitative and multiplexed chemical-genetic phenotyping in mammalian cells with QMAP-Seq
Source: PubMed Central journal article supplement (PMC7661543; doi:10.1038/s41467-020-19553-8), 2020-11-12
Supplement: 41467_2020_19553_MOESM2_ESM.pdf [file 41467_2020_19553_MOESM2_ESM.pdf]

**Title:** Supplementary Data 1.

**Descriptions:** P5 5001-5016 staggered PCR primer sequences.

**Title:** Supplementary Data 2.

**Descriptions:** P7 7001-7096 PCR primer sequences.

**Title:** Supplementary Data 3.

**Descriptions:** i5 compound index sequences.

**Title:** Supplementary Data 4.

**Descriptions:** i7 compound index sequences.

**Title:** Supplementary Data 5.

**Descriptions:** Cell line barcode read sequences.

**Title:** Supplementary Data 6.

**Descriptions:** sgRNA barcode read sequences.

**Title:** Supplementary Data 7.

**Descriptions:** Compounds, compound targets, compound pathways, and dose ranges for QMAP-Seq.

**Title:** Supplementary Data 8.

**Descriptions:** Relative cell number values for the 83,520 cell line-sgRNA-compound-dose-replicate combinations.

**Title:** Supplementary Data 9.

**Descriptions:** AUC values for the 20,880 cell line-sgRNA-compound-replicate combinations.

**Title:** Supplementary Data 10.

**Descriptions:** AUC difference and significance values after data filtering. Statistical significance was determined using an unpaired, two-tailed t test ( $n = 2$  biologically independent replicates). No adjustment was made for multiple comparisons.

**Title:** Supplementary Data 11.

**Descriptions:** Complete list of primers used for cloning and sequencing library amplification.
